# Supplementary material
Source: PubMed Central journal article supplement (PMC4936574)
Supplement: supp_pp.16.00404_PP2016-00404R1_Supplemental_Material.pdf [file supp_pp.16.00404_PP2016-00404R1_Supplemental_Material.pdf]

**Table S1: ROS-responsive SAA gene list.** ROS-responsive gene sets obtained from Gadjev et al. (2006) and compared with SAA-specific genes from Rossel et al. (2007)

| Accession number                                                           | Description                                                                                                                     |
|----------------------------------------------------------------------------|---------------------------------------------------------------------------------------------------------------------------------|
| <b>Shared O<sub>2</sub><sup>-</sup> responsive genes</b>                   |                                                                                                                                 |
| AT2G17840                                                                  | Upregulated by high light, drought, cold and salt stress.                                                                       |
|                                                                            |                                                                                                                                 |
| <b>Shared H<sub>2</sub>O<sub>2</sub> responsive genes</b>                  |                                                                                                                                 |
| AT5G54300                                                                  | Unknown                                                                                                                         |
| AT2G30500                                                                  | Kinase interacting family protein                                                                                               |
| AT1G70140                                                                  | Encodes a group I formin. Involved in the initiation and tip growth of root hairs through regulation of the actin cytoskeleton. |
|                                                                            |                                                                                                                                 |
| <b>Shared <sup>1</sup>O<sub>2</sub> responsive genes of known function</b> |                                                                                                                                 |
| At1g16370                                                                  | putative transport protein                                                                                                      |
| At4g34410                                                                  | AP2 domain transcription factor                                                                                                 |
| At4g27654                                                                  | Expressed protein                                                                                                               |
| At5g47240                                                                  | mutT domain protein-like                                                                                                        |
| At1g61610                                                                  | receptor-like kinase, putative                                                                                                  |
| At4g08170                                                                  | inositol 1,3,4-trisphosphate 5/6-kinase-like protein                                                                            |
| At5g63450                                                                  | cytochrome P450-like protein                                                                                                    |
| At2g44840                                                                  | ethylene response element binding protein                                                                                       |
| At5g22630                                                                  | chorismate mutase/prephenate dehydratase-like protein                                                                           |
| At1g49450                                                                  | En/Spm-like transposon protein, putative                                                                                        |
| At4g10390                                                                  | putative protein kinase CLV1 receptor kinase                                                                                    |
| At3g59350                                                                  | protein kinase-like protein Pto kinase interactor 1                                                                             |
| At5g67210                                                                  | putative protein                                                                                                                |
| At5g56980                                                                  | putative protein                                                                                                                |
| At1g18710                                                                  | MYB transcription factor                                                                                                        |
| At2g35710                                                                  | putative glycogenin                                                                                                             |
| At1g73080                                                                  | receptor protein kinase, putative                                                                                               |
| At4g35480                                                                  | RING-H2 finger protein RHA3b                                                                                                    |
| At3g15990                                                                  | putative sulfate transporter                                                                                                    |
| At1g09940                                                                  | putative glutamyl-tRNA reductase 2                                                                                              |
| At2g01150                                                                  | RING-H2 finger protein RHA2b                                                                                                    |
| At2g37900                                                                  | putative peptide/amino acid transporter                                                                                         |
| At1g07500                                                                  | hypothetical protein                                                                                                            |
| At2g30360                                                                  | putative protein kinase                                                                                                         |
| At1g74430                                                                  | AtMYB95                                                                                                                         |

**Table S1: ROS-specific SAA gene list (continued)**

| Accession number                                                                    | Description                                           |
|-------------------------------------------------------------------------------------|-------------------------------------------------------|
| <b>Shared <sup>18</sup>O<sub>2</sub> responsive genes of known function (cont.)</b> |                                                       |
| At2g39420                                                                           | putative phospholipase                                |
| At5g24590                                                                           | NAC2-like protein                                     |
| At1g74930                                                                           | AP2 domain transcription factor, putative             |
| At5g65280                                                                           | G protein-coupled receptor-like protein               |
| At5g66210                                                                           | calcium-dependent protein kinase                      |
| At1g74100                                                                           | putative flavonol sulfotransferase                    |
| At2g20880                                                                           | AP2 domain transcription factor                       |
| At3g10300                                                                           | unknown protein                                       |
| At3g44260                                                                           | CCR4-associated factor 1-like protein                 |
| At5g26030                                                                           | ferrochelataase-I                                     |
| At2g47180                                                                           | putative galactinol synthase                          |
| At3g46930                                                                           | protein kinase 6-like protein                         |
| At3g53780                                                                           | membrane protein                                      |
| At1g74450                                                                           | unknown protein                                       |
| At5g60300                                                                           | receptor like protein kinase                          |
| At2g20340                                                                           | putative tyrosine decarboxylase                       |
| At5g60890                                                                           | MYB transcription factor (ATR1)                       |
| At2g29450                                                                           | glutathione S-transferase                             |
| At2g47060                                                                           | putative protein kinase                               |
| At5g64310                                                                           | arabinogalactan-protein                               |
| At1g63830                                                                           | unknown protein                                       |
| At1g67060                                                                           | hypothetical protein                                  |
| At4g27940                                                                           | mitochondrial carrier protein                         |
| At5g17490                                                                           | RGL3 transcription factor                             |
| At1g76380                                                                           | hypothetical protein                                  |
| At3g56260                                                                           | putative protein                                      |
| At3g56880                                                                           | putative protein                                      |
| At3g05640                                                                           | putative protein phosphatase-2C                       |
| At1g75230                                                                           | 3-methyladenine DNA glycosylase, putative             |
| At1g50640                                                                           | ethylene responsive element binding factor 3 (AtERF3) |
| At5g64260                                                                           | phi-1-like protein                                    |
| At3g05580                                                                           | putative serine threonine protein phosphatase         |
| At5g09440                                                                           | putative protein phi-1                                |

**Table S1: ROS-specific SAA gene list (continued)**

| Accession number                                                                   | Description                                                                                                           |
|------------------------------------------------------------------------------------|-----------------------------------------------------------------------------------------------------------------------|
| <b>Shared <sup>1</sup>O<sub>2</sub> responsive genes of known function (cont.)</b> |                                                                                                                       |
| At1g27770                                                                          | envelope Ca <sup>2+</sup> -ATPase                                                                                     |
| At1g78080                                                                          | AP2 domain transcription factor RAP2.4                                                                                |
| At2g43020                                                                          | putative amine oxidase                                                                                                |
| At5g55120                                                                          | putative protein                                                                                                      |
| At1g28380                                                                          | unknown protein                                                                                                       |
| At3g17860                                                                          | unknown protein                                                                                                       |
| At1g11960                                                                          | unknown protein                                                                                                       |
| At1g28050                                                                          | CONSTANS family zinc finger protein                                                                                   |
| At1g01260                                                                          | bHLH transcription factor                                                                                             |
| At3g26980                                                                          | geranylgeranylated protein, putative                                                                                  |
| At1g70480                                                                          | unknown protein                                                                                                       |
| At1g08930                                                                          | zinc finger protein ATZF1                                                                                             |
| At1g52720                                                                          | hypothetical protein                                                                                                  |
| <b>Shared general stress response genes</b>                                        |                                                                                                                       |
| AT1G27730                                                                          | SALT TOLERANCE ZINC FINGER, TF                                                                                        |
| AT1G80840                                                                          | pathogen induced TF                                                                                                   |
| AT4G17230                                                                          | Encodes a scarecrow-like protein (SCL13).Member of GRAS gene family.                                                  |
| AT4G27410                                                                          | Encodes a NAC transcription factor induced in response to desiccation.                                                |
| AT4G17500                                                                          | Encodes a member of the ERF (ethylene response factor) subfamily B-3 of ERF/AP2 transcription factor family           |
| AT1G52890                                                                          | encodes a NAC transcription factor whose expression is induced by drought, high salt, and abscisic acid.              |
| AT5G47220                                                                          | Encodes a member of the ERF (ethylene response factor) subfamily B-3 of ERF/AP2 transcription factor family.          |
| AT5G59820                                                                          | zinc finger protein involved in high light and cold acclimation, TF                                                   |
| AT1G43160                                                                          | encodes a member of the ERF (ethylene response factor) subfamily B-4 of ERF/AP2 transcription factor family (RAP2.6). |
| AT5G04340                                                                          | putative C2H2 zinc finger TF                                                                                          |
| AT2G38470                                                                          | TF, involved in response to various abiotic stresses - especially salt stress.                                        |
| AT2G40140                                                                          | Salt-inducible zinc-finger protein                                                                                    |
| AT1G77450                                                                          | NAC domain containing protein 32                                                                                      |
| AT1G19020                                                                          | unknown, response to oxidative stress                                                                                 |

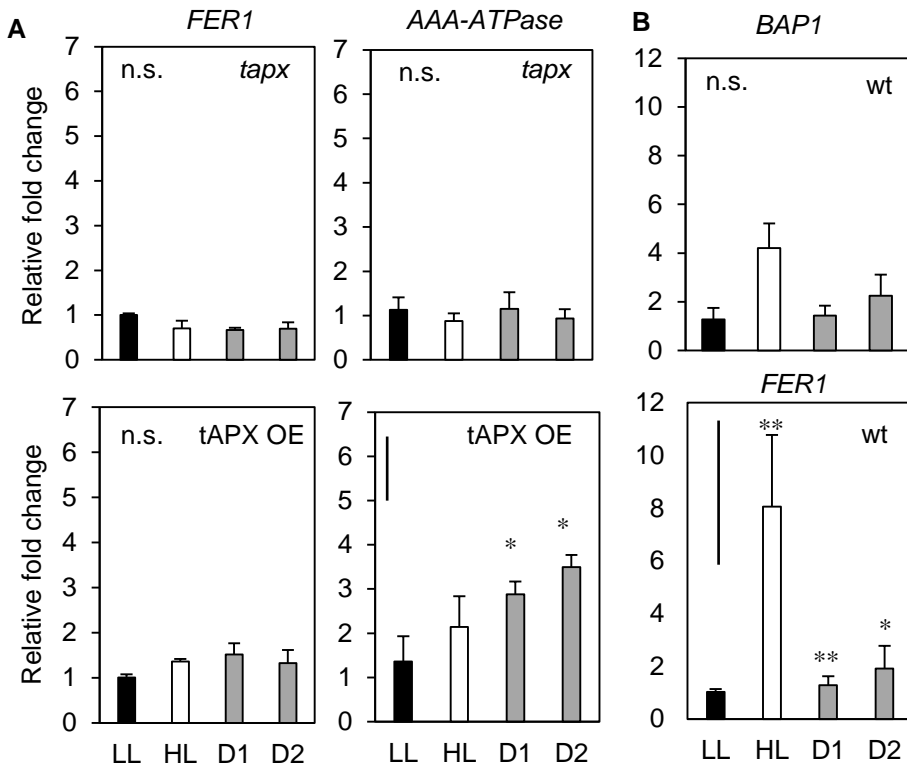

**C**

Level of expression (signal intensity on Affymetrix Arabidopsis ATH1 Genome Array)

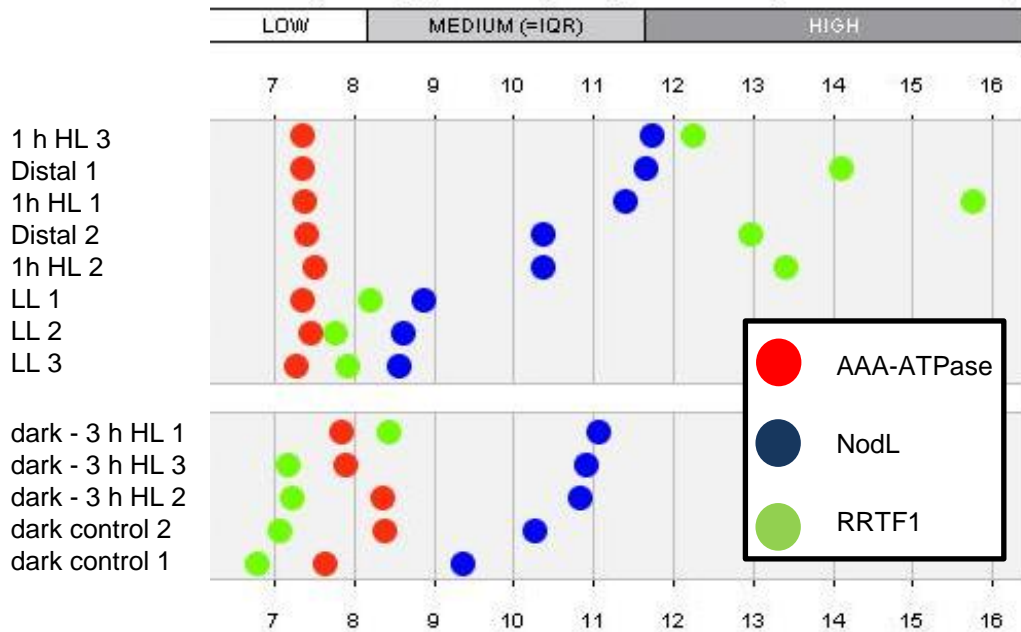

created with GENEVESTIGATOR

**Figure S1: Commonly used ROS marker genes, *FER1* and *AAA-ATPase* are not induced by LED HL in stable silenced and overexpressing tAPX lines.** (A) Transcriptional analysis of *FER1* (H<sub>2</sub>O<sub>2</sub> marker), and *AAA-ATPase* (commonly used to demonstrate RB but not MV induction) in *tapx 2/1* and the tAPX -14/2 overexpression lines. (B) *FER1* and *BAP1* (<sup>1</sup>O<sub>2</sub> marker) are shown for wt tissue, as well as (C) Geninvestigator data demonstrating the differences between *AAA-ATPase*, *NodL* (<sup>1</sup>O<sub>2</sub> responsive SAA marker), and *RRTF1* (SAA marker) from the Rossel et al., (2007) microarray (AT-00345) and a Shao et al., (2013) microarray (AT-00691) of seedlings grown on plates under different growth conditions. The latter tissue was from seedlings grown under continuous (100 μmol photons m<sup>-2</sup> s<sup>-1</sup>) light on plates, transferred at 12 days to the dark for 3 days, and treated with 3 h HL (1000 μmol photons m<sup>-2</sup> s<sup>-1</sup>). LL, low light; HL, high light; D1, lower distal leaf position 5; D2, upper distal leaf position 7. One-way ANOVAs were performed on each *ZAT10* data set, *post hoc* Fisher's LSD results are displayed as a bar in the top left corner of each plot. t-test were performed on *ELIP2* data sets. \*p < 0.05, \*\* p < 0.005 n.s., not significant. Error bars represent standard error, N = 3.

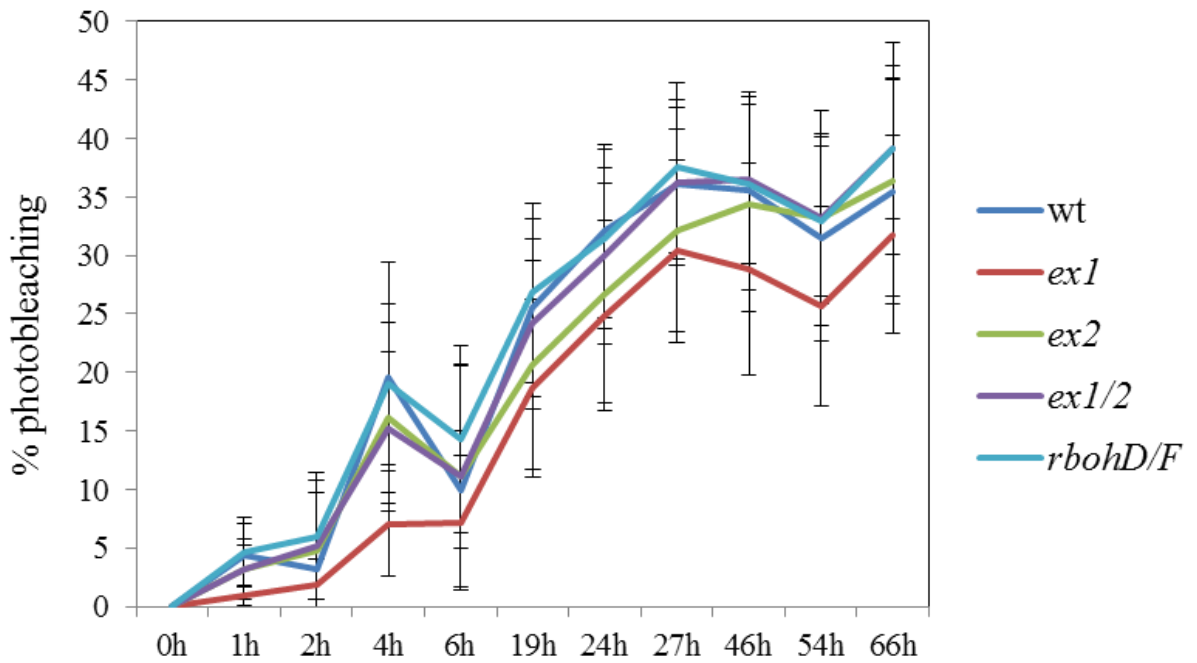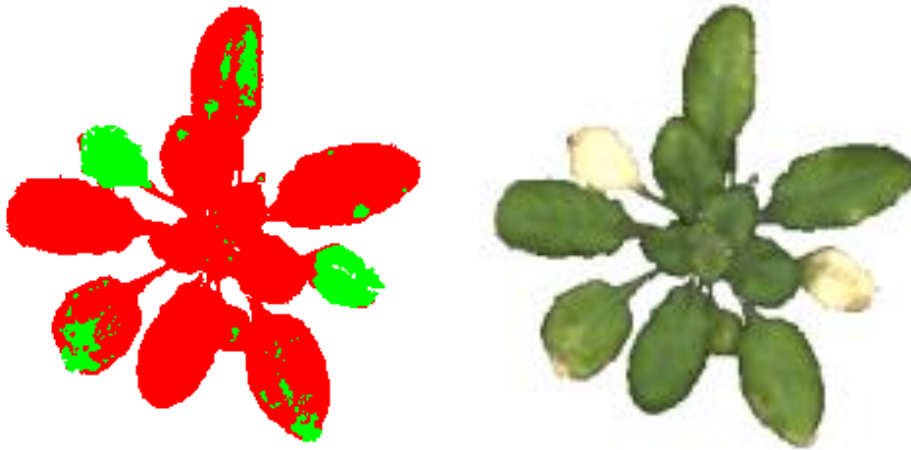

**Figure S2: Comparison of photobleaching development between ROS signaling mutants.** (A) Bleaching percentages were obtained through the Scanalyser and were normalised to 0% at time 0. Dark blue, *wt*; red, *ex1*; green, *ex2*; purple, *ex1/ex2*; light blue, *rbohD/F*. Error bars represent standard deviation, n = 15. (B) representative images of photobleaching on a plant undergoing continuous HL and detection by the Scanalyzer software.

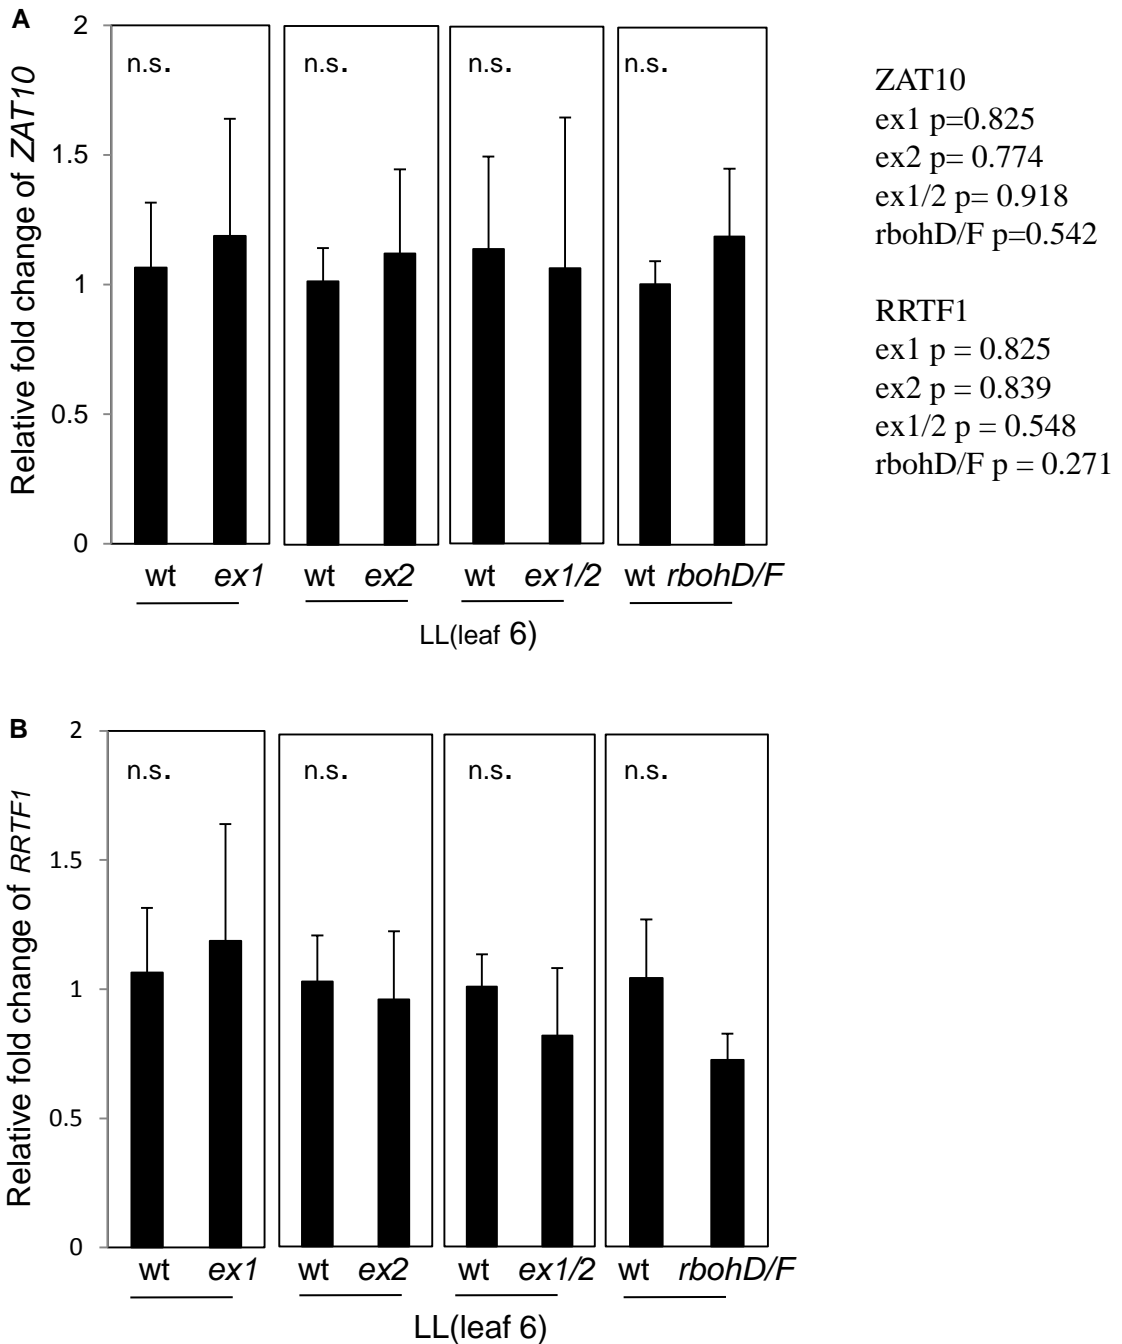

**Figure S3: Basal *ZAT10* and *RRTF1* induction in LL tissue of wt and ROS signaling mutants.** (A) *ZAT10* induction comparing wt-Col with *ex1*, *ex2*, *ex1/2*, and *rbohD/F* LL tissue, (B) *RRTF1* for the same comparisons. One-way ANOVAs were performed on each data set, *post hoc* Fisher's LSD statistics are displayed as n.s. (not significant) in the top left corner of each plot. Error bars represent standard error; N = 3.

**Table S2 A: Statistical tests for differences within ZAT10 ROS-signaling mutant data sets.** Statistical results of one-way ANOVAs and post hoc Fischer LSD and Holm-Sidak tests within mutant datasets. N = 3.

| <b>Data set</b> | <b>one-way ANOVA</b> | <b>Fischer LSD</b> | <b>Holm-Sidak</b>                       |
|-----------------|----------------------|--------------------|-----------------------------------------|
| ex1             | p = 0.0021           | 0.924              | HL vs LL (0.004), D1(0.019), D2 (0.031) |
| ex1/2           | p = 0.043            | 0.638              | HL vs D2 (0.006)                        |
| ex2             | p = 0.005            | 1.071              | D1 vs LL (0.002), D2 (0.015)            |
| rbohD/F         | p = 0.004            | 2.104              | HL vs LL (0.001), D2(0.003), D1 (0.017) |

**Table S2 B: Statistical tests for differences within RRTF1 ROS-signaling mutant data sets.** Statistical results of one-way ANOVAs and post hoc Fischer LSD and Holm-Sidak tests within mutant data sets. N = 3.

| <b>Data set</b> | <b>one-way ANOVA</b> | <b>Fischer LSD</b> | <b>Holm-Sidak</b>                          |
|-----------------|----------------------|--------------------|--------------------------------------------|
| ex1             | p = 0.076            | n.s.               | -                                          |
| ex1/2           | p = 0.397            | n.s.               | -                                          |
| ex2             | p = 0.001            |                    | D1 vs LL, HL vs LL                         |
| rbohD/F         | p < 0.001            | 9.659              | HL vs LL (<0.001), D2(<0.001), D1 (<0.001) |



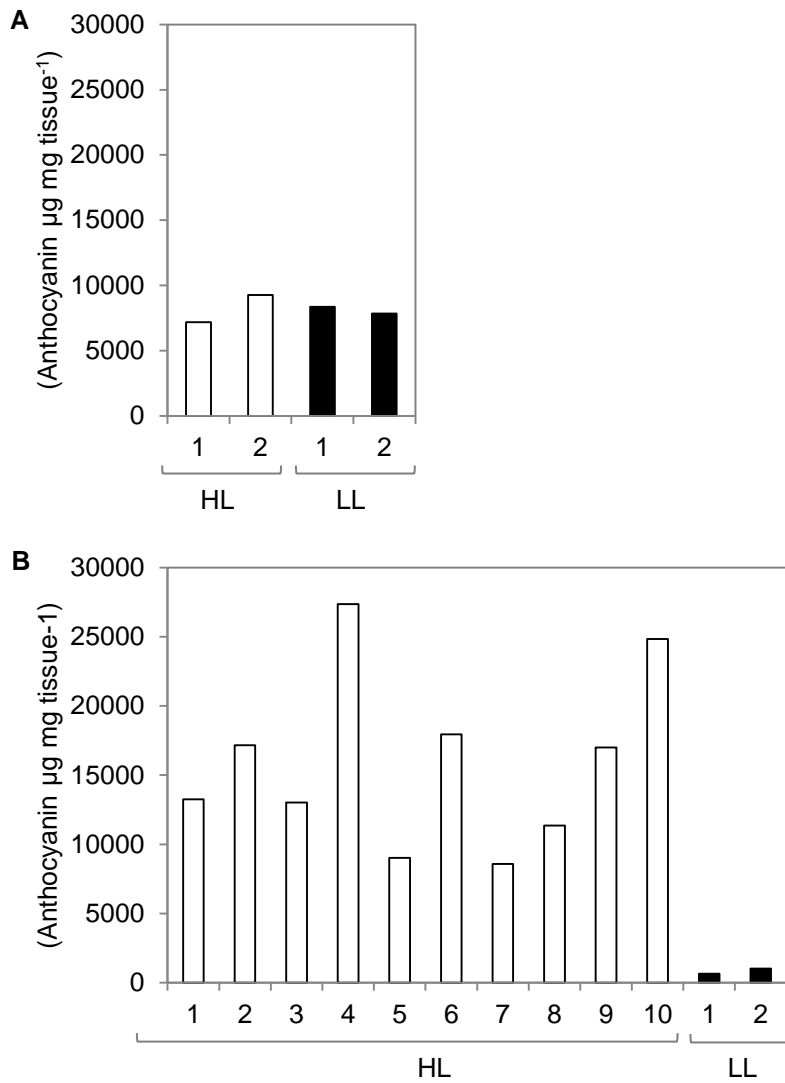

**Figure S4: Anthocyanin Test Assays.** (A) anthocyanin accumulation in tissues exposed to 1 h  $1000 \mu\text{mol photons m}^{-2} \text{s}^{-1}$  HL; (B) anthocyanin accumulation after 3 days of HL-treatment. White bars represent HL-treated tissue; black bars represent LL controls.

| Time (h) | Plant | 1 | 2 | 3 | 4 | 5 | 6 | 7 | 8 | 9 | 10 | 11 | 12 | 13 | 14 | 15 | 16 |
|----------|-------|---|---|---|---|---|---|---|---|---|----|----|----|----|----|----|----|
| 2.5      | 2     | 2 | 0 | T | 0 | 0 | 3 | 0 | 0 | 0 | 0  | 0  | 0  | 0  |    |    |    |
| 20       | 2     | 2 | 1 | T | 2 | 1 | 3 | 0 | 1 | 1 | 1  | 1  | 1  | 1  | 1  | 1  |    |
| 2.5      | 4     | 0 | 0 | T | 0 | 0 | 0 | 0 | 0 | 0 | 0  | 0  | 0  | 0  |    |    |    |
| 20       | 4     | 0 | 0 | T | 3 | 2 | 2 | 0 | 1 | 0 | 1  | 1  | 1  | 1  | 0  |    |    |
| 2.5      | 5     | 0 | 0 | T | 0 | 0 | 0 | 0 | 0 | 0 | 0  | 0  | 0  | 0  | 0  | 0  |    |
| 20       | 5     | 0 | 0 | T | 0 | 0 | 0 | 0 | 0 | 0 | 0  | 0  | 0  | 0  | 0  | 0  |    |
| 2.5      | 3     | 0 | 0 | 1 | T | 1 | 0 | 3 | 1 | 0 | 1  | 0  | 1  | 0  |    |    |    |
| 20       | 3     | 0 | 0 | 1 | T | 1 | 0 | 2 | 0 | 0 | 1  | 1  | 1  | 1  | 1  |    |    |
| 2.5      | 1     | 2 | 1 | 3 | 1 | 0 | T | 0 | 2 | 3 | 0  | 1  | 0  | 0  | 2  | ?  | ?  |
| 20       | 1     | 2 | 1 | 3 | 2 | 0 | T | 0 | 2 | 3 | 0  | 2  | 1  | 1  | 1  | 1  | 1  |
| 2.5      | 7     | 0 | 2 | 1 | 0 | 1 | T | 1 | 2 | 3 | 2  | 3  | 1  | 0  | 2  | 1  | 0  |
| 2.5      | 8     | 1 | 0 | 3 | 0 | 1 | T | 2 | 3 | 3 | 0  | 3  | 1  | 0  | 2  | 1  | 1  |
| 2.5      | 11    | 1 | 0 | 3 | 0 | 3 | T | 1 | 2 | 3 | 0  | 3  | 1  | 1  | 1  | 1  | 0  |
| 2.5      | 9     | 0 | 0 | 1 | 1 | 0 | 3 | 2 | 2 | T | 0  | 2  | 2  | 1  | 3? | 1? | 1? |
| 2.5      | 10    | 0 | 0 | 1 | 0 | 0 | 3 | 3 | 0 | T | 0  | 2  | 3  | 0  | 0  | 0  | 0  |

**Figure S5: Rhodamine B infiltrations.** 2.5 and 20 h after infiltration of Rhodamine B fed through petioles of leaf insertion 6. In general, the dye infiltrates tissues in an orthostichous pattern.

**Table S3: Statistical analysis results for connected and unconnected leaf data sets.**  
 Statistical results of one-way ANOVAs and post hoc Fischer LSD and Holm-Sidak tests within experimental data sets.

| <b>Data set</b>    | <b>one-way ANOVA</b> | <b>Fischer LSD</b> | <b>Holm-Sidak</b>                                                                                             |
|--------------------|----------------------|--------------------|---------------------------------------------------------------------------------------------------------------|
| ZAT10 vasc. 5 min  | p < 0.001            | 1.795              | HL vs all tissue (< 0.001)                                                                                    |
| ZAT10 vasc. 1 h    | p < 0.001            | 2.128              | HL vs all tissue (<0.001), D1 vs O1 (0.033), O2 (0.022)                                                       |
| RRTF1 vasc. 5 min  | p < 0.001            | 2.155              | HL vs LL (<0.001), D1(0.004), D2 (<0.001), O2 (<0.001) O1 vs O2 (<0.001), D2(0.001), LL (0.002),D1 (0.011)    |
| RRTF1 vasc. 30 min | n.s. 0.461           | - - -              |                                                                                                               |
| RRTF1 vasc. 1 h    | p = 0.006            | 14.433             | HL vs LL (p< 0.001), D1(0.004), O2 (0.003) O1 vs LL (p< 0.011) D2 vs LL (0.032)                               |
| NodL vasc. 5 min   | n.s. p = 0.718       | - - -              |                                                                                                               |
| NodL vasc. 30 min  | p < 0.001            | 6.325              | HL vs all tissue (p < 0.001)                                                                                  |
| NodL vasc. 1 h     | p < 0.001            | 10.805             | HL vs all tissue (p < 0.001) O2 vs LL (0.005), D1(0.013), D2 (0.012), O1 vs LL (0.013), D2(0.037), D1 (0.041) |

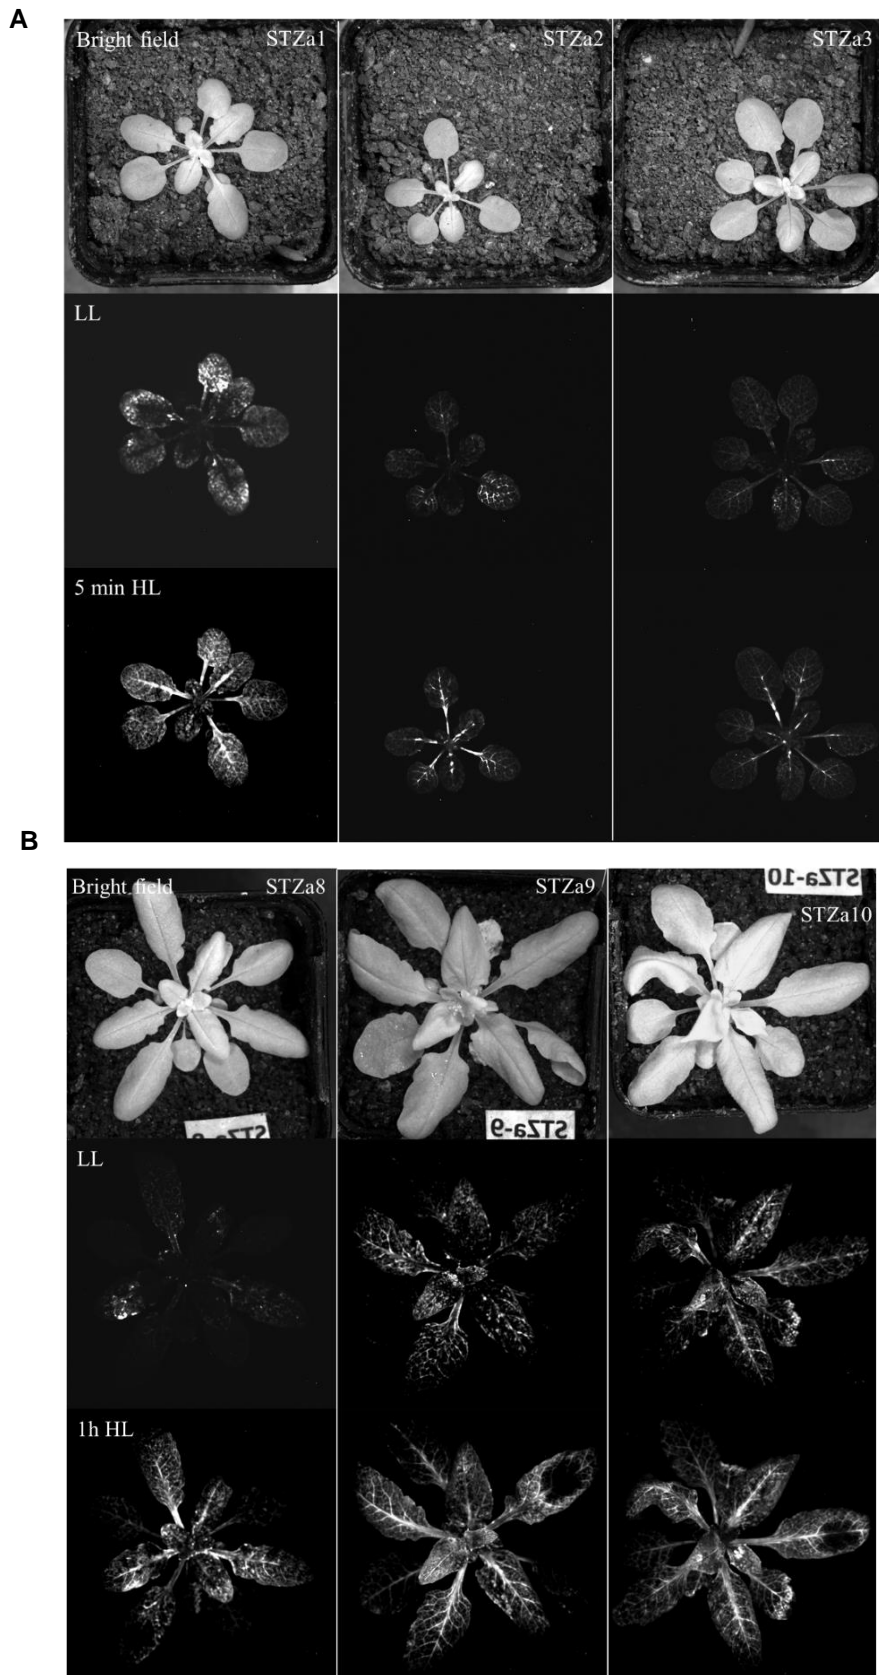

**Figure S6: 5 min and 1h timepoints from the HL spot treatment of ZAT10::LUC HL-specific transgenics.** CCD camera images of three biologicals, including the bright field image, under LL, and after either (A) 5 min or (B) 1h HL spot treatment of leaf position 6.

**Table S4: Shared  $\beta$ -cyclocitral and SAA genes.** Shared genes from the  $\beta$  -cyclocitral (Ramel et al., 2012) and SAA (Rossel et al., 2007) microarrays.

| <b>Accession number</b> | <b>Gene name</b>       | <b>Compartment</b>                                      |
|-------------------------|------------------------|---------------------------------------------------------|
| AT1G17420               | LOX3                   | chloroplast                                             |
| AT4G36010               |                        | anchored to membrane, extracellular region              |
| AT3G25780               | AOC3                   | chloroplast, plasma membrane, vacuolar membrane         |
| AT5G05600               |                        | cytoplasm                                               |
| AT1G80840               | WRKY40                 | nucleus                                                 |
| AT4G17230               | SCL13                  | nucleus                                                 |
| AT4G27410               | RD26, ANAC072          | nucleus                                                 |
| AT2G06050               | OPR3                   | peroxisome                                              |
| AT5G10695               |                        | extracellular region, mitochondrion                     |
| AT4G17500               | ERF1                   | nuclear pore, nucleus                                   |
| AT3G51450               |                        | chloroplast, endomembrane system                        |
| AT5G47220               | ERF2                   | nucleus                                                 |
| AT1G32920               |                        | endomembrane system                                     |
| AT1G28480               | GRX480, ROXY19         | cytoplasm                                               |
| AT5G27520               | PNC2                   | mitochondrial inner membrane, mitochondrion, peroxisome |
| AT3G55980               | SZF1                   | nucleus                                                 |
| AT3G29575               | AFP3                   | nucleus                                                 |
| AT5G09440               | EXL4                   | chloroplast, membrane, plasmodesma                      |
| AT3G15210               | ERF4                   | nuclear body, nucleus                                   |
| AT1G19300               | PARVUS/GLZ1            | endoplasmic reticulum                                   |
| AT2G42540               | COR15A                 | chloroplast, chloroplast envelope, chloroplast stroma   |
| AT5G59820               | ZAT12                  | intracellular, nucleus                                  |
| AT2G29440               | GSTU6/GST24            | cytoplasm, cytosol                                      |
| AT1G66090               |                        | chloroplast                                             |
| AT3G56880               |                        | nucleus                                                 |
| AT1G73480               |                        | cytoplasm                                               |
| AT4G18010               | 5PTASE2/IP5PII         | cytoplasm                                               |
| AT1G70700               | JAZ9                   | nucleus                                                 |
| AT4G20860               |                        | cytoplasm                                               |
| AT4G15210               | ATBETA-AMY, BAM5, BMY1 | chloroplast, cytoplasm                                  |
| AT2G23810               | TET8                   | golgi apparatus, plasma membrane, plasmodesma           |
| AT1G29330               | ERD2                   | golgi apparatus, ER                                     |
| AT1G72450               | JAZ6                   | nucleus                                                 |
| AT5G04340               | ZAT6                   | nucleus                                                 |
| AT2G36590               | PROT3                  | plasma membrane                                         |
| AT1G05575               |                        | endoplasmic reticulum                                   |
| AT1G09070               | (AT)SRC2               | ER, plasma membrane, vacuole                            |
| AT2G26530               | AR781                  | chloroplast, plasma membrane                            |
| AT2G38470               | WRKY33                 | nucleus                                                 |
| AT1G01720               | ATAF1                  | nucleus                                                 |

**Table S4: Shared  $\beta$  -cyclocitral and SAA genes (continued)**

| <b>Accession number</b> | <b>Gene name</b>    | <b>Compartment</b>                            |
|-------------------------|---------------------|-----------------------------------------------|
| AT2G41100               | TCH3                | mitochondrion, plasmodesma, vacuolar membrane |
| AT5G13190               | GILP                | plasma membrane                               |
| AT5G06870               | PGIP2               | cytosol                                       |
| AT1G51090               |                     | nucleus                                       |
| AT5G62570               |                     |                                               |
| AT4G12720               | NUDT7               | cytoplasm, plasma membrane                    |
| AT5G14700               |                     |                                               |
| AT4G34710               | ADC2                | nucleus                                       |
| AT5G42050               |                     | nucleus                                       |
| AT4G34150               |                     | cytosol, plasmodesma                          |
| AT1G14130               |                     | cytoplasm, nucleus                            |
| AT1G71100               | RSW10               | cytoplasm                                     |
| AT2G46600               |                     | nucleus                                       |
| AT5G35735               |                     | plasma membrane                               |
| AT2G40140               | CZF1, SZF2          | nucleus                                       |
| AT5G26030               | FC1                 | chloroplast, mitochondrion                    |
| AT2G33380               | RD20, CLO3          | chloroplast membrane, vacuole                 |
| AT2G23320               | WRK15               | nucleus                                       |
| AT1G01140               | CIPK9, PKS6         | cytoplasm, plasma membrane                    |
| AT1G42990               | BZIP60              | ER, nucleus                                   |
| AT1G73500               | MKK9                | mitochondrion                                 |
| AT5G25930               |                     | plasma membrane                               |
| AT1G77450               | ANAC032             | nucleus                                       |
| AT3G52800               |                     | nucleus                                       |
| AT1G09970               | RLK7                | micropyle, plasma membrane                    |
| AT1G30620               | HSR8, MUR4,<br>UXE1 | golgi apparatus                               |
| AT4G16760               | ACX1                | peroxisome, plasmodesma                       |
| AT2G01450               | MPK17               | nucleus                                       |
| AT4G36990               | HSF4                | nucleus                                       |
| AT3G23920               | BAM1, BMY7          | chloroplast, cytosol, nucleus                 |
| AT4G24160               |                     | unknown                                       |
| AT2G29450               | GSTU5               | plasma membrane, plasmodesma                  |
| AT5G10380               | RING1               | plasma membrane                               |
| AT5G47060               |                     | nucleus                                       |

**Table S5: qRT-PCR primers and used for Roche (with UPL probes) and SybrGreen for quantitative transcript analysis.**

| Target | Accession | Probe   | Primer sequence (5' -3')  |
|--------|-----------|---------|---------------------------|
| CYP5   | At2g29960 | UPL 103 | GGCAGTTCCTAAAACCTGCAGAA   |
|        |           |         | TTCCCTTGTAGTGTAGAGGTTTCC  |
| PP2A   | At1g13320 | UPL 120 | GACCGGAGCCAACCTAGGAC      |
|        |           |         | AAATGCGACAAAACCTGGTAACT   |
| ZAT10  | At1g27730 | UPL 31  | GGACAAAGGGTAAGCGATCTAA    |
|        |           |         | AGAAGCATGAGGCAAAAAGC      |
| RRTF1  | At4g34410 | UPL 68  | TCGGGTATGCATTATCCTAACA    |
|        |           |         | AAGCTCTTGCTCCGGTGA        |
| NodL   | At5g64870 | UPL144  | TCGTGTTCTTGTTGCTTCCA      |
|        |           |         | TGAACCTTGTCAAACACTTCCTT   |
| ELIP2  | At4g14690 | UPL 101 | CCACCACAAATGCCACAG        |
|        |           |         | GCAAATCTCCAAACTTCGTACTC   |
| FER1   | At5g01600 | UPL 21  | CTGAAAAAGGAGATGCTTTATATGC |
|        |           |         | TGAGGCCACTTTGTGAACG       |
| BAP1   | At3g61190 | UPL 152 | TAAACCGGAGACCCATCAAG      |
|        |           |         | TCGACATTTCTCGTCGATTTT     |
